# Supplementary material
Source: PubMed Central journal article supplement (PMC5129174)

**Supplementary Table 1.** Subsequent therapy with docetaxel among elderly and younger subgroups (intent-to-treat population)

|                                             | Elderly ( $\geq 75$ years)                  |                                       | Younger ( $< 75$ years)                     |                                       |
|---------------------------------------------|---------------------------------------------|---------------------------------------|---------------------------------------------|---------------------------------------|
|                                             | Abiraterone-prednisone<br>( <i>n</i> = 185) | Prednisone alone<br>( <i>n</i> = 165) | Abiraterone-prednisone<br>( <i>n</i> = 361) | Prednisone alone<br>( <i>n</i> = 377) |
| Subsequent therapy with docetaxel, n (%)    | 59 (31.9)                                   | 68 (41.2)                             | 180 (49.9)                                  | 236 (62.6)                            |
| No subsequent therapy with docetaxel, n (%) | 126 (68.1)                                  | 97 (58.8)                             | 181 (50.1)                                  | 141 (37.4)                            |

**Supplementary Table 2.** Adverse events reported during treatment, by 3 age categories (safety population)

|                                 | ≥75 years                             |               |                             |               | 65–74 years                           |               |                             |               | <65 years                             |               |                             |               |
|---------------------------------|---------------------------------------|---------------|-----------------------------|---------------|---------------------------------------|---------------|-----------------------------|---------------|---------------------------------------|---------------|-----------------------------|---------------|
|                                 | Abiraterone-<br>prednisone<br>(n=182) |               | Prednisone alone<br>(n=164) |               | Abiraterone-<br>prednisone<br>(n=225) |               | Prednisone alone<br>(n=222) |               | Abiraterone-<br>prednisone<br>(n=135) |               | Prednisone alone<br>(n=154) |               |
|                                 | Grades<br>1-4                         | Grades<br>3/4 | Grades<br>1-4               | Grades<br>3/4 | Grades<br>1-4                         | Grades<br>3/4 | Grades<br>1-4               | Grades<br>3/4 | Grades<br>1-4                         | Grades<br>3/4 | Grades<br>1-4               | Grades<br>3/4 |
| Subjects with<br>TEAE, n (%)    | 182<br>(100.0)                        | 104<br>(57.1) | 163<br>(99.4)               | 92<br>(56.1)  | 223<br>(99.1)                         | 109<br>(48.4) | 214<br>(96.4)               | 88<br>(39.6)  | 133<br>(98.5)                         | 54<br>(40.0)  | 147<br>(95.5)               | 55<br>(35.7)  |
| TEAE leading<br>to death, n (%) | 14 (7.7)                              |               | 9 (5.5)                     |               | 5 (2.2)                               |               | 5 (2.3)                     |               | 2 (1.5)                               |               | 2 (1.3)                     |               |

TEAE = treatment-emergent adverse event.

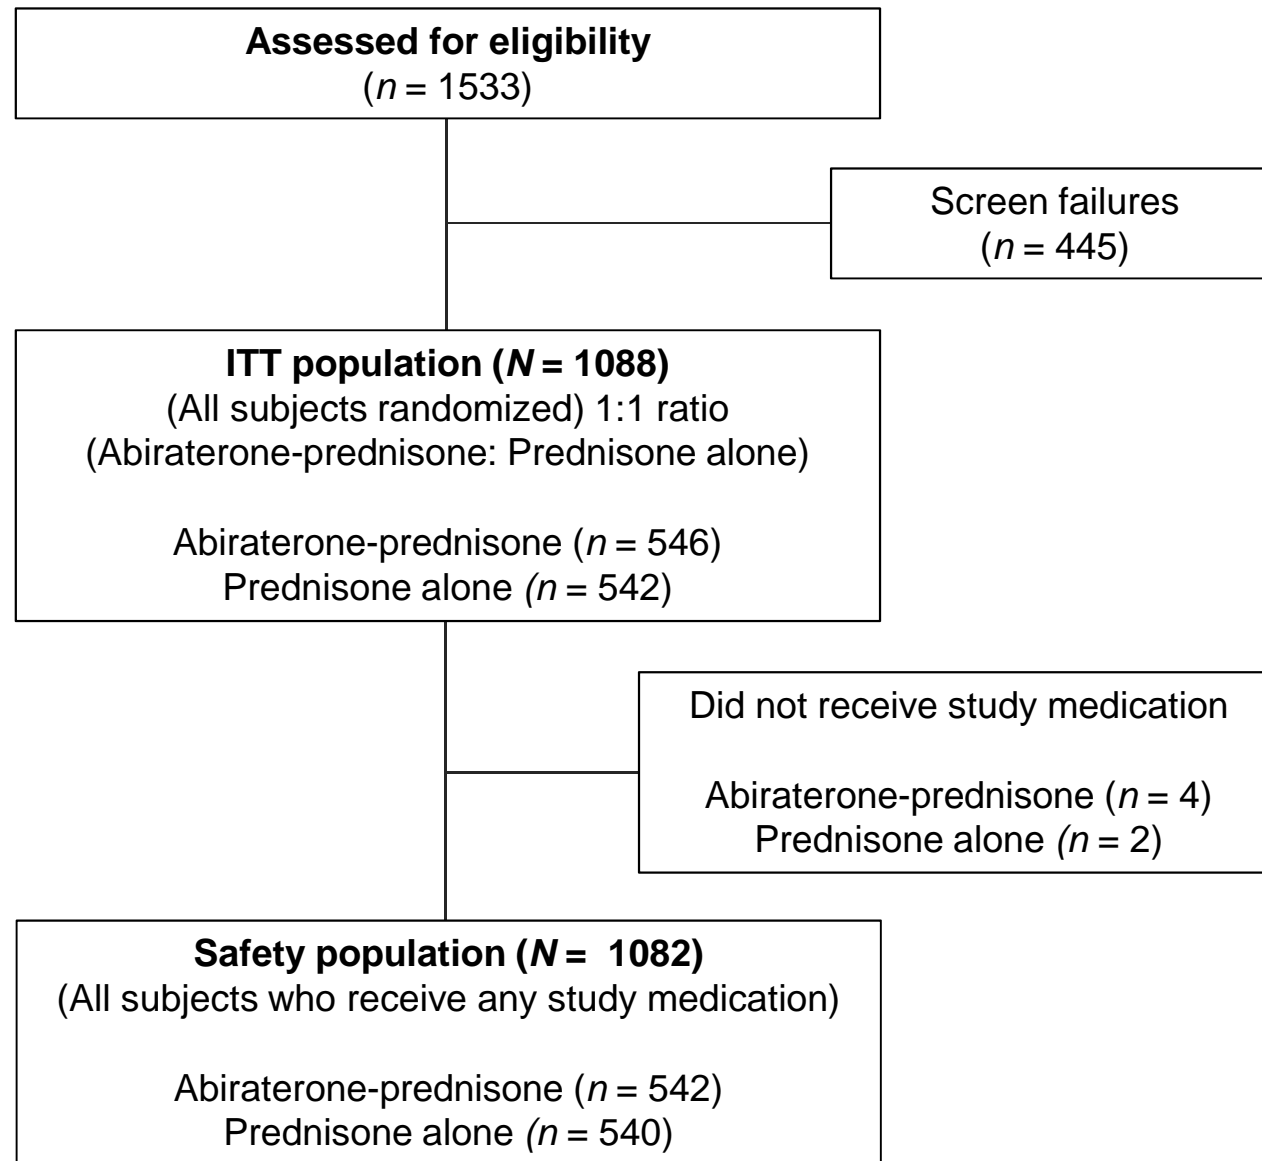

Supplement: NIHMS827593-supplement-supplement_1.pdf [file NIHMS827593-supplement-supplement_1.pdf]
